# Supplementary material for: Combinatorial effect of calcium chloride and polyethylene glycol on efficient isolation of small extracellular vesicles
Source: Royal Society of Chemistry journal article supplement (doi:10.1039/d3an01955a), 2024-01-01
Supplement: d3an01955a1.pdf [file d3an01955a1.pdf]

Electronic Supplementary Information

**Combinatorial Effect of Calcium Chloride and Polyethylene Glycol  
For efficient Isolation of small Extracellular Vesicles**

Rahmat Asfiya <sup>a</sup>, Grace McCully <sup>a</sup>, Anjugam Paramanatham <sup>c</sup>, Siddharth Das <sup>a</sup>, and Akhil  
Srivastava <sup>\*a,b</sup>

*<sup>a</sup>Department of Pathology and Anatomical Sciences, University of Missouri School of Medicine,  
Columbia, MO 65212, USA.*

*<sup>b</sup>Ellis Fischel Cancer Centre, University of Missouri School of Medicine, Columbia, MO 65212,  
USA.*

**CORRESPONDING AUTHOR**

**\*DR. AKHIL SRIVASTAVA**

Department of Pathology and Anatomical Sciences, University of Missouri School of Medicine,  
Columbia, MO 65212, USA.

**ORCID:** <https://orcid.org/0000-0003-2015-259X>

**Email:** [akhil.srivastava@health.missouri.edu](mailto:akhil.srivastava@health.missouri.edu)

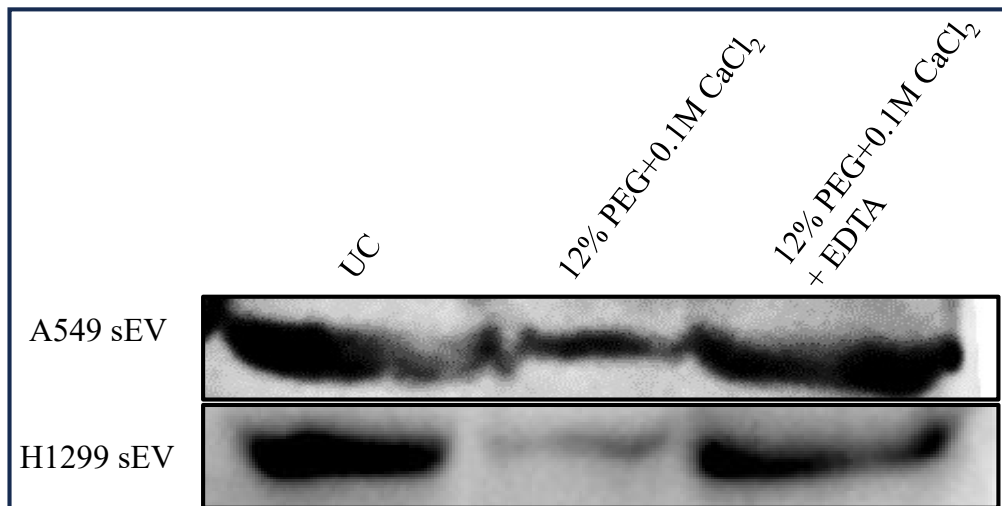

**Figure S 1:** Western blot of CD63 marker for H1299 and A549 sEV

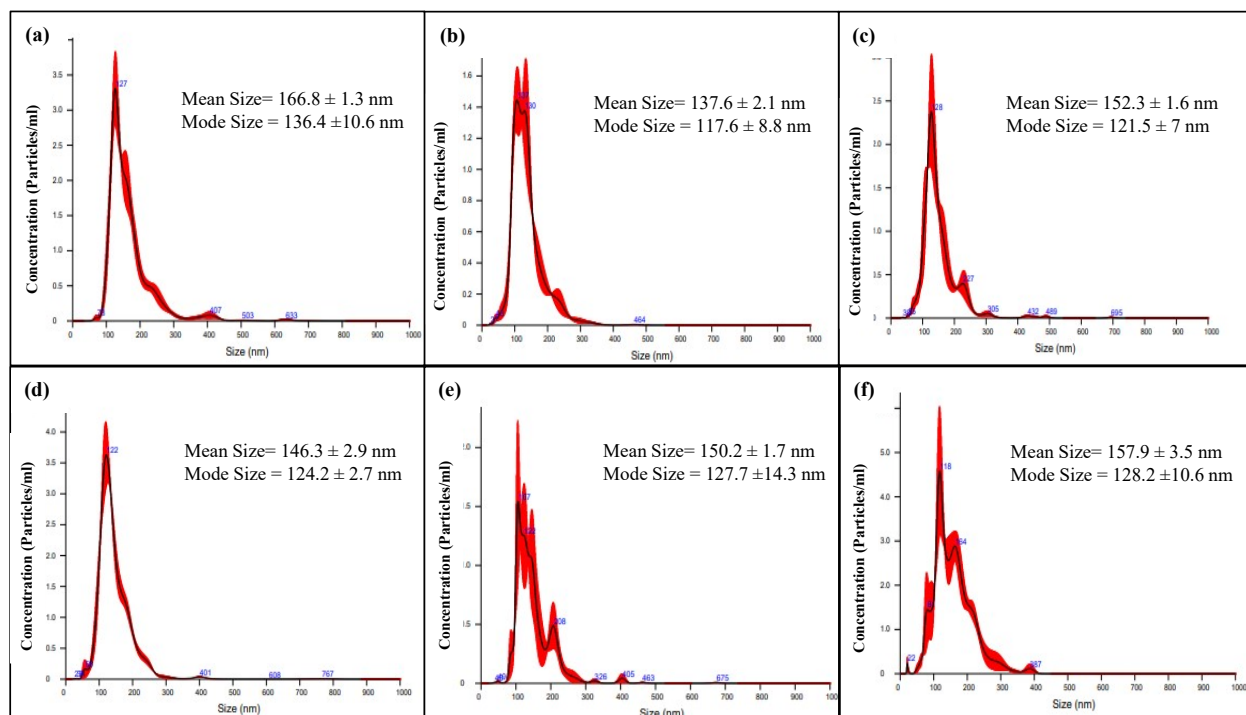

**Figure S2:** NTA plot of A549 EVs isolated from (a) Ultracentrifugation (b) 0.1M CaCl<sub>2</sub> (c) 8 % PEG + 0.1M CaCl<sub>2</sub> (d) 8 % PEG + 0.1M CaCl<sub>2</sub> (e) 8 % PEG (f) 12 % PEG.

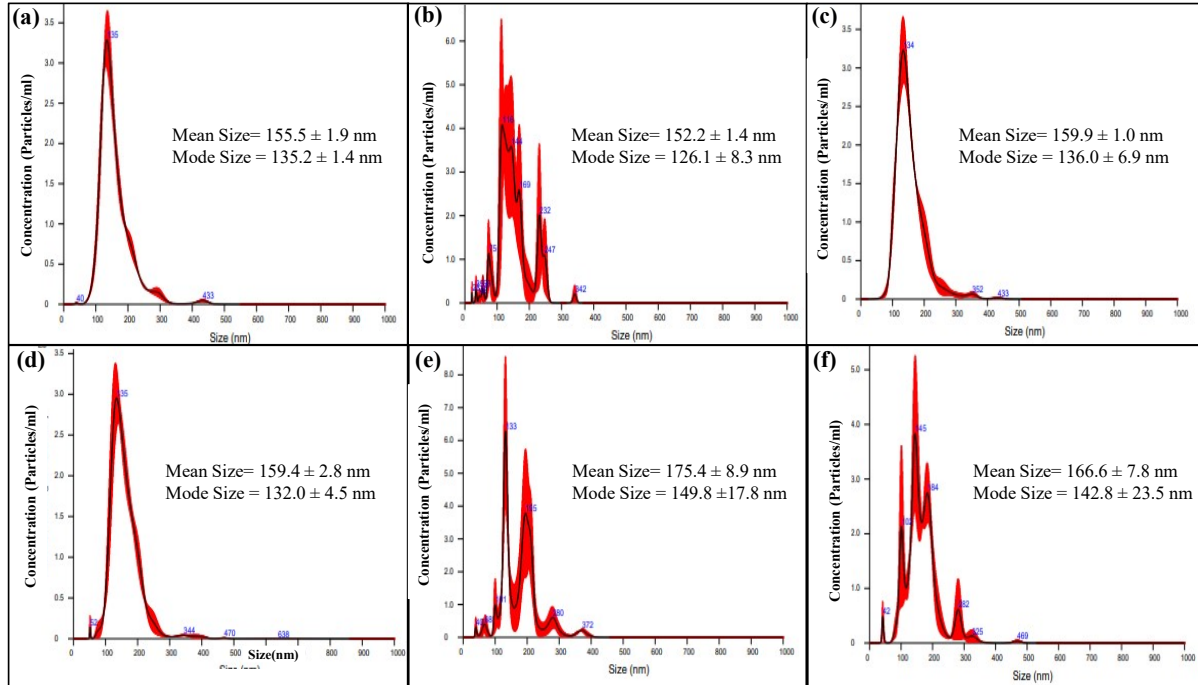

**Figure S 3:** NTA plot of H1299 EVs isolated from (a) Ultracentrifugation (b) 0.1M CaCl<sub>2</sub> (c) 8 % PEG + 0.1M CaCl<sub>2</sub> (d) 8 % PEG + 0.1M CaCl<sub>2</sub> (e) 8 % PEG (f) 12 % PEG.

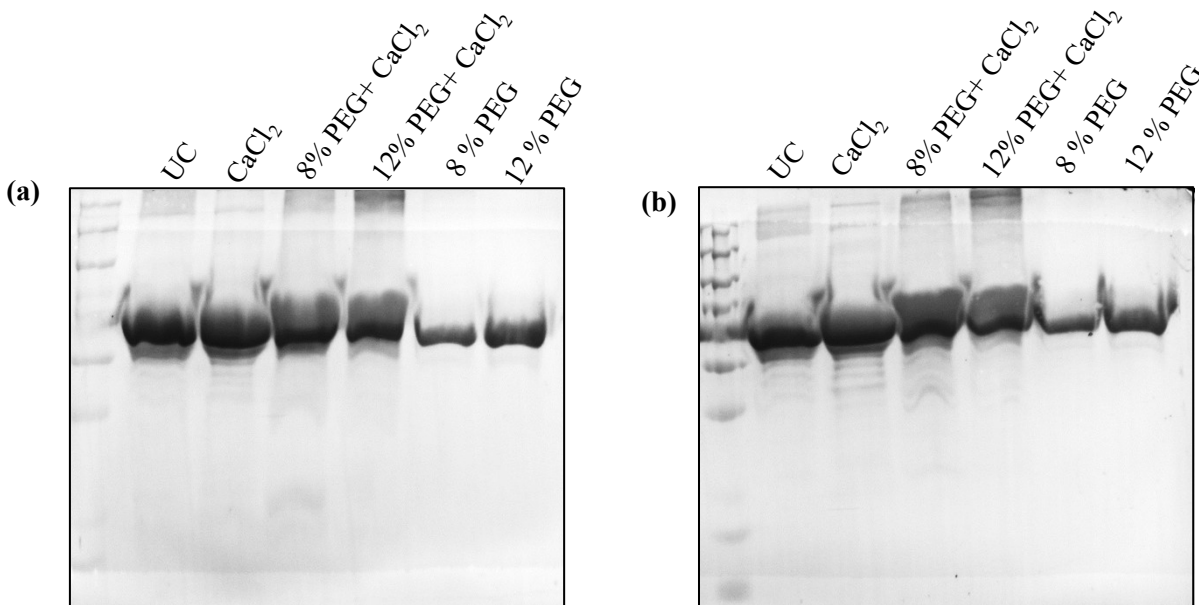

**Figure S 4:** Total protein staining of blot by ponceau of sEV isolated from different methods of (a) H1299 Cells and (b) A549 Cells.

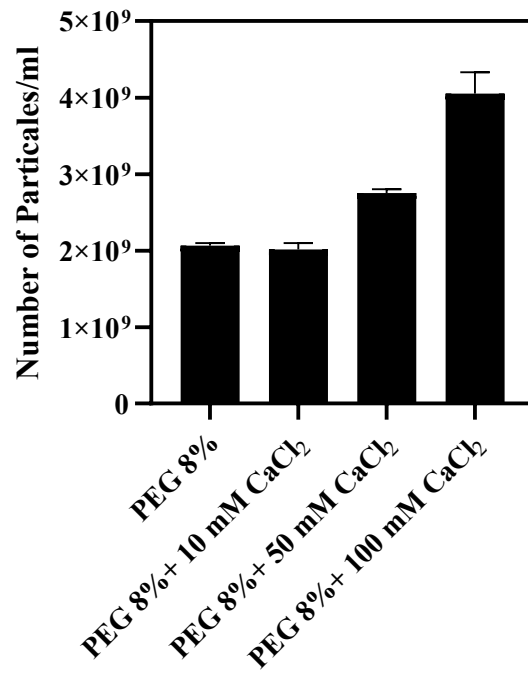

**Figure S 5:** NTA plot of A549 sEV isolated by different concentrations of Calcium chloride and PEG.

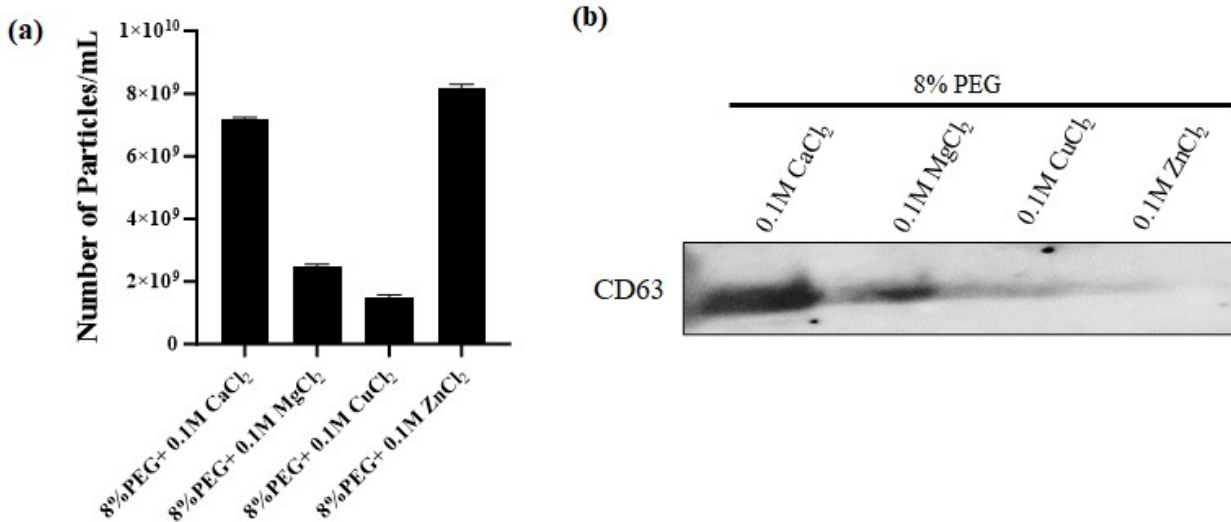

**Figure S 6:** (a) NTA plot (b) Western blot for EVs marker CD63 of A549 EVs with 0.1M of metal ions + 8% PEG.

(a)

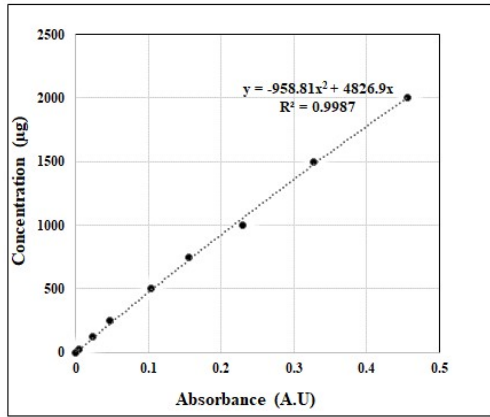

(b)

| Serial No. | Formulations          | A549 sEV              | H1299 sEV             |
|------------|-----------------------|-----------------------|-----------------------|
|            |                       | Concentration (µg/ml) | Concentration (µg/ml) |
| 1          | UC                    | 1.819879              | 1.645453              |
| 2          | Exoquick              | 0.779256153           | 0.815311894           |
| 3          | PEG/NaCl              | 0.364149163           | 0.702366445           |
| 4          | PEG/CaCl <sub>2</sub> | 1.483822              | 1.268256              |

**Figure S 7** (a) BCA Calibration curve of protein and (b) Protein value calculated from curve for A549 sEV and H1299 sEV.

(a)

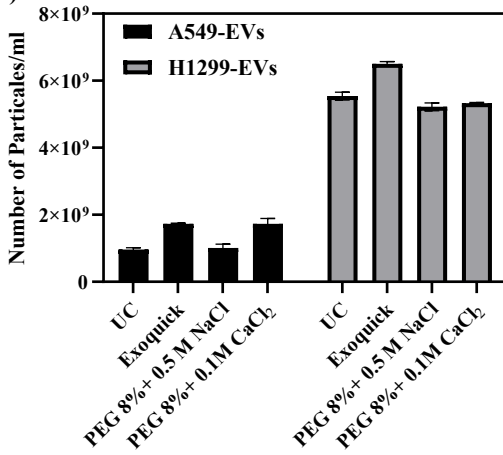

(b)

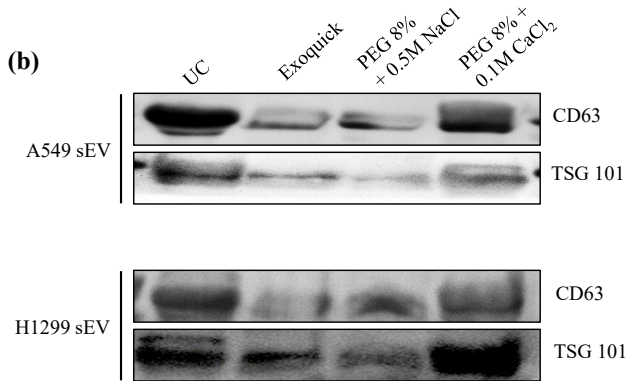

**Figure S 7:** (a) NTA plot (b) Western blot for sEV marker CD63 and TSG101 of A549 EVs and H1299 sEV isolated from different method.

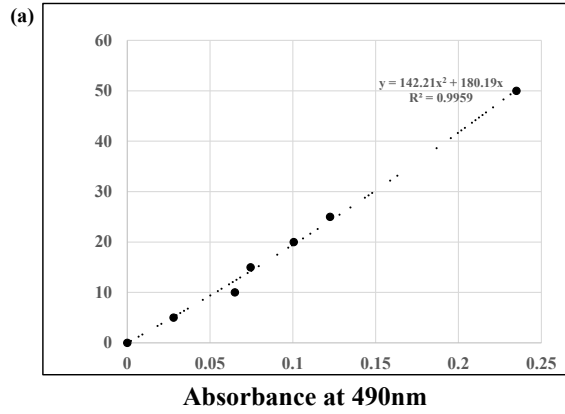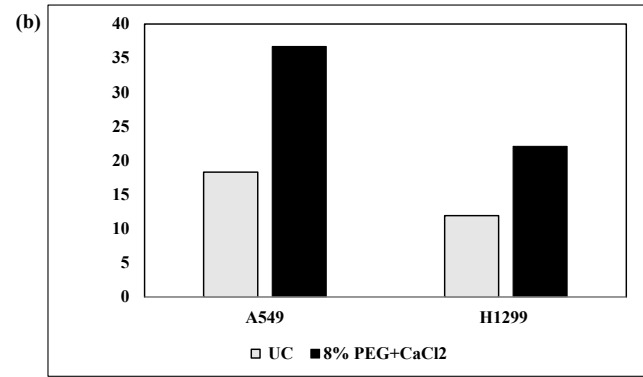

**Figure S 8:** (a) Calibration curve of known concentration of doxorubicin (b) Amount of doxorubicin present inside the sEV after purification.
